# Supplementary material for: Cyst Reduction by Melatonin in a Novel Drosophila Model of Polycystic Kidney Disease
Source: PubMed Central journal article supplement (PMC7700119; doi:10.3390/molecules25225477), 2020-11-23
Supplement: molecules-25-05477-s001.pdf [file molecules-25-05477-s001.pdf]

# **Cyst reduction by melatonin in a novel *Drosophila* model of polycystic kidney disease**

**Cassandra Millet-Boureima <sup>1</sup>, Roman Rozencwaig <sup>2</sup>, Felix Polyak <sup>2</sup>  
and Chiara Gamberi <sup>1,\*</sup>**

<sup>1</sup> Biology Department, Concordia University, Montreal H4B 1R6, QC, Canada;  
[cassandra.millet@mail.concordia.ca](mailto:cassandra.millet@mail.concordia.ca) (C.M.B.)

<sup>2</sup> BH Bioscience, Montreal, H3W 2L2; [rachmilr@gmail.com](mailto:rachmilr@gmail.com) (R.R.) ;  
[rcq003@gmail.com](mailto:rcq003@gmail.com) (F.P.)

\* Correspondence: [chiara.gamberi@concordia.ca](mailto:chiara.gamberi@concordia.ca) (C.G.); Tel.:+1-524 848 2424  
ext. 3395

*BicC*<sup>Δ/YC33</sup>

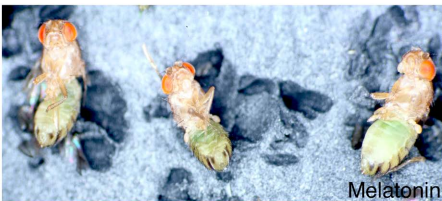

*BicC*<sup>Δ/IF34</sup>

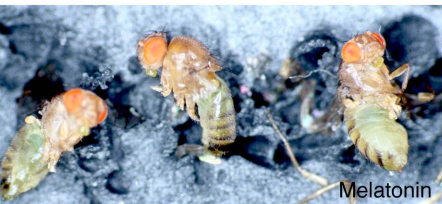

**Figure S1. Melatonin feeding control.** *BicC* flies fed melatonin mixed with green dye for three days, displayed ingested food contents visible through their semi-transparent abdominal cuticle. Legs were clipped for better visualization.

**BicC [*delta/YC33*] 18-20d** (18 days after treatment)

| CONTROL | Anterior | Anterior     | Anterior | Posterior | Posterior    | Posterior |
|---------|----------|--------------|----------|-----------|--------------|-----------|
|         | Terminal | Intermediate | Proximal | Terminal  | Intermediate | Proximal  |
| 1       | 2        | 6            | 2        | 4         | 3            | 0         |
| 2       | 7        | 10           | 0        | 5         | 8            | 3         |
| 3       | 6        | 5            | 0        | 5         | 6            | 3         |
| 4       | 5        | 13           | 1        | 5         | 9            | 5         |
| 5       | 5        | 9            | 2        | 4         | 7            | 1         |
| 6       | 6        | 13           | 1        | 4         | 7            | 1         |
| 7       | 8        | 13           | 1        | 6         | 8            | 3         |
| 8       | 5        | 10           | 0        | 7         | 8            | 5         |
| 9       | 6        | 12           | 0        | 4         | 5            | 1         |
| 10      | 4        | 7            | 1        | 3         | 7            | 2         |
| 11      | 7        | 11           | 2        | 4         | 9            | 3         |
| 12      | 8        | 10           | 3        | 3         | 8            | 2         |
| 13      | 7        | 11           | 1        | 6         | 9            | 3         |
| 14      | 6        | 6            | 0        | 6         | 5            | 1         |
| 15      | 6        | 11           | 3        | 7         | 8            | 1         |
| 16      | 6        | 7            | 1        | 6         | 13           | 3         |
| 17      | 4        | 8            | 0        | 6         | 13           | 2         |
| 18      | 6        | 7            | 0        | 5         | 7            | 2         |
| 19      | 5        | 9            | 2        | 3         | 6            | 4         |
| 20      | 6        | 7            | 2        | 6         | 5            | 4         |
| 21      | 5        | 5            | 3        | 5         | 4            | 0         |
| 22      | 4        | 8            | 0        | 3         | 6            | 2         |
| 23      | 6        | 13           | 0        | 7         | 9            | 2         |
| 24      | 2        | 10           | 0        | 6         | 7            | 3         |
| 25      | 8        | 11           | 1        | 7         | 7            | 1         |
| 26      | 0        | 3            | 0        | 3         | 3            | 3         |
| 27      | 7        | 4            | 1        | 4         | 7            | 2         |
| 28      | 5        | 3            | 0        | 4         | 5            | 2         |
| 29      | 2        | 5            | 0        | 4         | 8            | 3         |
| 30      | 0        | 0            | 0        | 1         | 1            | 2         |
| 31      | 6        | 7            | 0        | 3         | 5            | 1         |
| 32      | 3        | 5            | 0        | 4         | 6            | 0         |
| 33      | 3        | 2            | 0        | 4         | 7            | 2         |
| 34      | 3        | 3            | 0        | 2         | 3            | 1         |
| 35      | 1        | 2            | 0        | 0         | 3            | 1         |
| 36      | 4        | 5            | 0        | 0         | 3            | 3         |
| 37      | 2        | 2            | 0        | 3         | 2            | 1         |

|                |     |     |    |     |     |     |
|----------------|-----|-----|----|-----|-----|-----|
| 38             | 0   | 0   | 0  | 2   | 2   | 2   |
| 39             | 1   | 4   | 0  | 2   | 4   | 1   |
| 40             | 5   | 5   | 0  | 6   | 5   | 0   |
| 41             | 4   | 5   | 0  | 0   | 3   | 3   |
| 42             | 3   | 4   | 0  | 1   | 3   | 1   |
| 43             | 0   | 0   | 0  | 0   | 2   | 0   |
| 44             | 0   | 0   | 0  | 1   | 1   | 2   |
| 45             | 3   | 5   | 0  | 2   | 3   | 3   |
| 46             | 0   | 0   | 0  | 0   | 0   | 2   |
| 47             | 2   | 2   | 0  | 2   | 4   | 2   |
| 48             | 2   | 5   | 0  | 1   | 2   | 2   |
| 49             | 0   | 0   | 0  | 0   | 0   | 2   |
| 50             | 0   | 3   | 0  | 3   | 5   | 3   |
| Total # of cys | 196 | 306 | 27 | 179 | 271 | 101 |

| MELATONIN | Anterior | Anterior     | Anterior | Posterior |
|-----------|----------|--------------|----------|-----------|
|           | Terminal | Intermediate | Proximal | Terminal  |
| 1         | 4        | 5            | 0        | 1         |
| 2         | 6        | 12           | 3        | 4         |
| 3         | 2        | 5            | 0        | 2         |
| 4         | 5        | 8            | 2        | 6         |
| 5         | 4        | 5            | 0        | 2         |
| 6         | 5        | 6            | 0        | 1         |
| 7         | 3        | 9            | 1        | 5         |
| 8         | 4        | 10           | 1        | 6         |
| 9         | 4        | 4            | 0        | 4         |
| 10        | 0        | 0            | 0        | 3         |
| 11        | 5        | 6            | 0        | 1         |
| 12        | 3        | 5            | 1        | 7         |
| 13        | 7        | 5            | 0        | 7         |
| 14        | 6        | 10           | 0        | 6         |
| 15        | 0        | 0            | 0        | 0         |
| 16        | 5        | 4            | 0        | 5         |
| 17        | 4        | 1            | 0        | 3         |
| 18        | 7        | 12           | 0        | 7         |
| 19        | 4        | 9            | 0        | 6         |
| 20        | 6        | 9            | 0        | 5         |
| 21        | 7        | 4            | 1        | 5         |
| 22        | 4        | 2            | 1        | 5         |
| 23        | 5        | 6            | 0        | 3         |
| 24        | 0        | 0            | 0        | 0         |
| 25        | 5        | 7            | 0        | 6         |
| 26        | 0        | 0            | 0        | 0         |
| 27        | 3        | 6            | 0        | 2         |
| 28        | 3        | 5            | 0        | 0         |
| 29        | 5        | 6            | 0        | 2         |
| 30        | 2        | 2            | 0        | 4         |
| 31        | 0        | 0            | 0        | 0         |
| 32        | 0        | 5            | 1        | 4         |
| 33        | 4        | 2            | 0        | 1         |
| 34        | 1        | 4            | 0        | 2         |
| 35        | 0        | 0            | 0        | 0         |
| 36        | 4        | 2            | 0        | 2         |
| 37        | 2        | 1            | 0        | 1         |

|      |                |     |     |    |     |
|------|----------------|-----|-----|----|-----|
|      | 38             | 4   | 5   | 0  | 4   |
|      | 39             | 0   | 0   | 0  | 0   |
|      | 40             | 0   | 0   | 0  | 0   |
|      | 41             | 0   | 0   | 0  | 3   |
|      | 42             | 1   | 4   | 0  | 3   |
|      | 43             | 0   | 0   | 0  | 0   |
|      | 44             | 0   | 0   | 0  | 1   |
|      | 45             | 0   | 0   | 0  | 1   |
|      | 46             | 0   | 2   | 0  | 1   |
|      | 47             | 1   | 1   | 0  | 0   |
|      | 48             | 0   | 0   | 0  | 0   |
|      | 49             | 0   | 0   | 0  | 0   |
|      | 50             | 1   | 4   | 0  | 3   |
| 1080 | Total # of cys | 136 | 193 | 11 | 134 |

| Posterior<br>Intermediate | Posterior<br>Proximal |
|---------------------------|-----------------------|
|---------------------------|-----------------------|

|   |   |
|---|---|
| 7 | 1 |
| 7 | 1 |
| 2 | 0 |
| 9 | 2 |
| 6 | 2 |
| 7 | 3 |
| 7 | 3 |
| 8 | 4 |
| 6 | 3 |
| 6 | 1 |
| 5 | 3 |
| 6 | 1 |
| 7 | 3 |
| 7 | 3 |
| 0 | 0 |
| 7 | 4 |
| 2 | 0 |
| 7 | 3 |
| 5 | 4 |
| 8 | 3 |
| 7 | 1 |
| 6 | 0 |
| 8 | 1 |
| 0 | 0 |
| 7 | 2 |
| 0 | 2 |
| 3 | 3 |
| 6 | 3 |
| 4 | 1 |
| 1 | 2 |
| 0 | 0 |
| 1 | 3 |
| 1 | 2 |
| 4 | 2 |
| 0 | 3 |
| 2 | 0 |
| 0 | 0 |

|   |   |
|---|---|
| 5 | 2 |
| 0 | 2 |
| 0 | 1 |
| 1 | 1 |
| 2 | 4 |
| 0 | 0 |
| 1 | 2 |
| 1 | 1 |
| 3 | 4 |
| 2 | 3 |
| 0 | 0 |
| 0 | 0 |
| 5 | 0 |

189

89

752



**BicC [*delta/IIF34*] 18-20d** (18 days of treatment)

| CONTROL | Anterior | Anterior     | Anterior | Posterior | Posterior    | Posterior |
|---------|----------|--------------|----------|-----------|--------------|-----------|
|         | Terminal | Intermediate | Proximal | Terminal  | Intermediate | Proximal  |
| 1       | 7        | 8            | 0        | 7         | 7            | 5         |
| 2       | 3        | 3            | 0        | 5         | 6            | 1         |
| 3       | 8        | 6            | 0        | 5         | 4            | 2         |
| 4       | 2        | 10           | 0        | 5         | 4            | 3         |
| 5       | 6        | 2            | 1        | 6         | 6            | 2         |
| 6       | 6        | 7            | 1        | 6         | 7            | 4         |
| 7       | 7        | 5            | 0        | 5         | 5            | 2         |
| 8       | 7        | 10           | 0        | 5         | 7            | 2         |
| 9       | 7        | 7            | 0        | 5         | 5            | 6         |
| 10      | 5        | 4            | 2        | 5         | 6            | 2         |
| 11      | 8        | 5            | 0        | 4         | 7            | 3         |
| 12      | 6        | 7            | 0        | 6         | 5            | 1         |
| 13      | 8        | 9            | 1        | 7         | 9            | 6         |
| 14      | 5        | 6            | 0        | 3         | 5            | 1         |
| 15      | 7        | 11           | 5        | 7         | 9            | 3         |
| 16      | 8        | 9            | 0        | 7         | 7            | 5         |
| 17      | 7        | 9            | 1        | 6         | 6            | 4         |
| 18      | 2        | 1            | 1        | 4         | 3            | 0         |
| 19      | 0        | 7            | 0        | 2         | 3            | 2         |
| 20      | 0        | 5            | 0        | 3         | 4            | 2         |
| 21      | 2        | 8            | 0        | 3         | 2            | 0         |
| 22      | 6        | 7            | 0        | 4         | 4            | 2         |
| 23      | 2        | 4            | 1        | 5         | 8            | 3         |
| 24      | 4        | 3            | 0        | 6         | 5            | 2         |
| 25      | 0        | 2            | 0        | 3         | 5            | 1         |
| 26      | 4        | 4            | 0        | 4         | 5            | 2         |
| 27      | 6        | 3            | 0        | 3         | 7            | 2         |
| 28      | 4        | 3            | 0        | 3         | 2            | 0         |
| 29      | 3        | 2            | 0        | 5         | 6            | 2         |
| 30      | 0        | 1            | 0        | 1         | 1            | 1         |
| 31      | 0        | 0            | 0        | 0         | 0            | 0         |
| 32      | 0        | 3            | 1        | 4         | 1            | 2         |
| 33      | 4        | 5            | 0        | 3         | 4            | 2         |
| 34      | 2        | 3            | 0        | 3         | 2            | 2         |
| 35      | 1        | 0            | 0        | 4         | 2            | 0         |
| 36      | 4        | 4            | 0        | 2         | 5            | 0         |
| 37      | 5        | 4            | 0        | 6         | 4            | 2         |

|                |     |     |    |     |     |    |
|----------------|-----|-----|----|-----|-----|----|
| 38             | 6   | 4   | 0  | 3   | 2   | 0  |
| 39             | 4   | 4   | 1  | 6   | 3   | 2  |
| 40             | 5   | 3   | 0  | 4   | 2   | 0  |
| 41             | 0   | 0   | 0  | 2   | 2   | 0  |
| 42             | 5   | 2   | 0  | 3   | 2   | 1  |
| 43             | 4   | 2   | 0  | 5   | 0   | 1  |
| 44             | 4   | 2   | 0  | 3   | 1   | 0  |
| 45             | 4   | 1   | 0  | 2   | 2   | 2  |
| 46             | 2   | 0   | 0  | 2   | 0   | 0  |
| 47             | 0   | 3   | 0  | 3   | 5   | 3  |
| 48             | 2   | 4   | 0  | 4   | 4   | 2  |
| 49             | 1   | 3   | 0  | 1   | 4   | 1  |
| 50             | 7   | 2   | 0  | 4   | 1   | 2  |
| Total # of cys | 200 | 217 | 15 | 204 | 206 | 93 |

| MELATONIN | Anterior | Anterior     | Anterior | Posterior |
|-----------|----------|--------------|----------|-----------|
|           | Terminal | Intermediate | Proximal | Terminal  |
| 1         | 7        | 9            | 0        | 8         |
| 2         | 6        | 8            | 0        | 6         |
| 3         | 4        | 4            | 0        | 6         |
| 4         | 7        | 4            | 1        | 8         |
| 5         | 0        | 0            | 0        | 6         |
| 6         | 5        | 2            | 0        | 6         |
| 7         | 4        | 5            | 1        | 5         |
| 8         | 4        | 2            | 0        | 5         |
| 9         | 3        | 7            | 0        | 6         |
| 10        | 6        | 8            | 1        | 5         |
| 11        | 4        | 1            | 0        | 6         |
| 12        | 2        | 2            | 0        | 4         |
| 13        | 7        | 5            | 3        | 8         |
| 14        | 6        | 12           | 0        | 7         |
| 15        | 5        | 3            | 0        | 6         |
| 16        | 7        | 8            | 0        | 7         |
| 17        | 3        | 4            | 0        | 6         |
| 18        | 0        | 8            | 5        | 5         |
| 19        | 5        | 7            | 0        | 4         |
| 20        | 3        | 7            | 0        | 5         |
| 21        | 3        | 6            | 0        | 5         |
| 22        | 4        | 4            | 0        | 4         |
| 23        | 4        | 6            | 1        | 5         |
| 24        | 2        | 5            | 0        | 4         |
| 25        | 3        | 3            | 0        | 4         |
| 26        | 4        | 3            | 0        | 7         |
| 27        | 5        | 7            | 0        | 1         |
| 28        | 0        | 0            | 0        | 0         |
| 29        | 4        | 2            | 0        | 5         |
| 30        | 0        | 0            | 0        | 0         |
| 31        | 6        | 7            | 1        | 2         |
| 32        | 2        | 0            | 0        | 0         |
| 33        | 3        | 0            | 0        | 4         |
| 34        | 1        | 1            | 0        | 0         |
| 35        | 3        | 2            | 0        | 2         |
| 36        | 0        | 0            | 0        | 2         |
| 37        | 0        | 0            | 0        | 0         |

|     |                |     |     |    |     |
|-----|----------------|-----|-----|----|-----|
|     | 38             | 3   | 1   | 0  | 1   |
|     | 39             | 0   | 0   | 0  | 0   |
|     | 40             | 1   | 2   | 0  | 1   |
|     | 41             | 0   | 0   | 0  | 0   |
|     | 42             | 3   | 0   | 0  | 3   |
|     | 43             | 4   | 1   | 0  | 0   |
|     | 44             | 5   | 4   | 0  | 0   |
|     | 45             | 6   | 2   | 0  | 4   |
|     | 46             | 3   | 2   | 0  | 1   |
|     | 47             | 4   | 2   | 0  | 3   |
|     | 48             | 3   | 3   | 0  | 3   |
|     | 49             | 2   | 1   | 0  | 4   |
|     | 50             | 2   | 2   | 1  | 6   |
| 935 | Total # of cys | 168 | 172 | 14 | 190 |

| Posterior<br>Intermediate | Posterior<br>Proximal |
|---------------------------|-----------------------|
|---------------------------|-----------------------|

|    |   |
|----|---|
| 5  | 5 |
| 7  | 2 |
| 6  | 4 |
| 11 | 2 |
| 2  | 2 |
| 3  | 4 |
| 3  | 1 |
| 2  | 0 |
| 6  | 5 |
| 5  | 2 |
| 7  | 0 |
| 5  | 3 |
| 9  | 5 |
| 10 | 2 |
| 8  | 2 |
| 7  | 5 |
| 6  | 6 |
| 4  | 2 |
| 6  | 1 |
| 6  | 3 |
| 6  | 2 |
| 1  | 2 |
| 5  | 1 |
| 2  | 0 |
| 2  | 1 |
| 5  | 3 |
| 6  | 2 |
| 0  | 4 |
| 4  | 1 |
| 0  | 0 |
| 2  | 4 |
| 0  | 0 |
| 5  | 0 |
| 0  | 0 |
| 1  | 2 |
| 1  | 0 |
| 0  | 0 |

3 0  
0 0  
0 0  
0 0  
3 1  
3 2  
2 3  
1 1  
6 2  
3 3  
4 0  
3 1  
2 0

|     |    |     |
|-----|----|-----|
| 188 | 91 | 823 |
|-----|----|-----|
